# Supplementary material for: Phylogenetic Distribution of Extant Richness Suggests Metamorphosis Is a Key Innovation Driving Diversification in Insects
Source: PLoS One. 2014 Oct 2;9(10):e109085. doi: 10.1371/journal.pone.0109085 (PMC4183542; doi:10.1371/journal.pone.0109085)
Supplement: Table S4 — The fifty most robustly recovered shifts inferred from 500 samples from the post-burnin Markov Chain Monte Carlo (MCMC). Shifts are plotted on Figure S3. Shifts without equivalents on the mean tree are highlighted in bold. (XLSX) [file pone.0109085.s007.xlsx]

## Sheet: Sheet1
Percentage occurrence in samples from the MCMC chain	Equivalent Model on Consensus tree	Taxa Impacted
1	20	Heloridae Maamingidae
		Mymarommatidae
		(Hymenoptera)
1	7	Archostemata + Myxophaga
		(Coleoptera)
0.992	21	Amphizoidae + Aspidytidae + Hygrobiidae
		(Coleoptera)
0.98	2	Holometabola
0.962	11	Neuropterida
0.95	15	Tettigoniidae (Orthoptera)
0.922	41	Pelecinidae + Roproniidae (Hymenoptera)
0.906	23	Coenagrionidae + Protoneuridae (Odonata)
0.848	9	Mecoptera + Siphonaptera
0.824	-	Obtectomera (Lepidoptera)
0.786	19	Reduviidae
		(Hemiptera)
0.758	12	Chrysomeloidea
		(Coleoptera)
0.722	34	Epimetopidae + Georissidae + Helophoridae + Spercheidae
		(Coleoptera)
0.708	5	Acrididae + Romaleidae
		(Orthoptera)
0.7	6	Trichoptera
0.696	38	Myrmeleontoidea + Nemopteridae + Ithonioidea + Chrysopidae + Hemerobiidae
		(Neuroptera)
0.678	45	Hyocephalidae + Idiostolidae (Hemiptera)
0.664	27	Elateridae (Coleoptera)
0.652	22	Miridae + Tingidae
		(Hemiptera)
0.628	24	Aphidoidea
		(Hemiptera)
0.614	4	Calyptratae + Drosophilidae + Ephydridae + Agromyzidae
		(Diptera)
0.598	-	Termitidae (Isoptera)
0.594	8	Psocodea
0.592	16	Apidae + Megachilidae
		(Hymenoptera)
0.57	14	Apataniidae + Goeridae +
		Limnephilidae
		(Trichoptera)
0.566	10	Ephemeroptera
0.564	30	Amphiesmenoptera
		(Lepidoptera + Trichoptera)
0.542	-	Buprestidae (Coleoptera)
0.522	18	Membracoidea
		(Hemiptera)
0.492	28	Eulophidae + Pteromalidae
		(Hymenoptera)
0.482	-	Curculionidae (Coleoptera)
0.476	37	Psocomorpha (Psocodea)
0.456	13	Bombycoidea (in part) + Cimeliidae
		(Lepidoptera)
0.442	36	Pentatomidae (Hemiptera)
0.442	3	Macromoths (Hyblaeoidea+ Pyraloidea+
		Noctuoidea+
		Geometroidea+
		Drepanoidea+
		Bombycoidea+
		Cimeliidae)
		(Lepidoptera)
0.424	-	Tenebrionidae (Coleoptera)
0.414	31	Glossata (excluding Eriocraniidae)
		(Lepidoptera)
0.4	43	Collembola (with exceptions of Neelipleona, Katiannidae and Tomoceridae)
0.388	40	Ditrysia (Lepidoptera)
0.372	-	Calyptrata (Diptera)
0.368	-	Sarcophagidae + Tachinidae (Diptera)
0.366	46	Limacodidae + Zygaenidae (Lepidoptera)
0.36	26	Asiloidea (in part)
		(Diptera)
0.354	44	Clambidae + Eucinetidae
		(Coleoptera)
0.352	39	Ceratocanthidae + Hybosoridae + Glaresidae + Lucanidae + Pleocomidae + Glaphyridae + Ochodaeidae + Passalidae
		(Coleoptera)
0.35	-	Anthicidae + Meloidae + Mordellidae (Coleoptera)
0.348	42	Pterygota
0.346	-	Neopomorpha+ Gerromorpha + Enicocephalomorpha+ Dipsocoromorpha (Hemiptera)
0.342	-	Blattidae + Blaberidae (Blattodea)
0.336	-	Mantidae (Mantodea)
